# Supplementary material for: Amidoamine Oxide Surfactants as Low-Molecular-Weight Hydrogelators: Effect of Methylene Chain Length on Aggregate Structure and Rheological Behavior
Source: MDPI journal article supplement (doi:10.3390/gels9030261), 2023-03-22
Supplement: s1 [file s1]

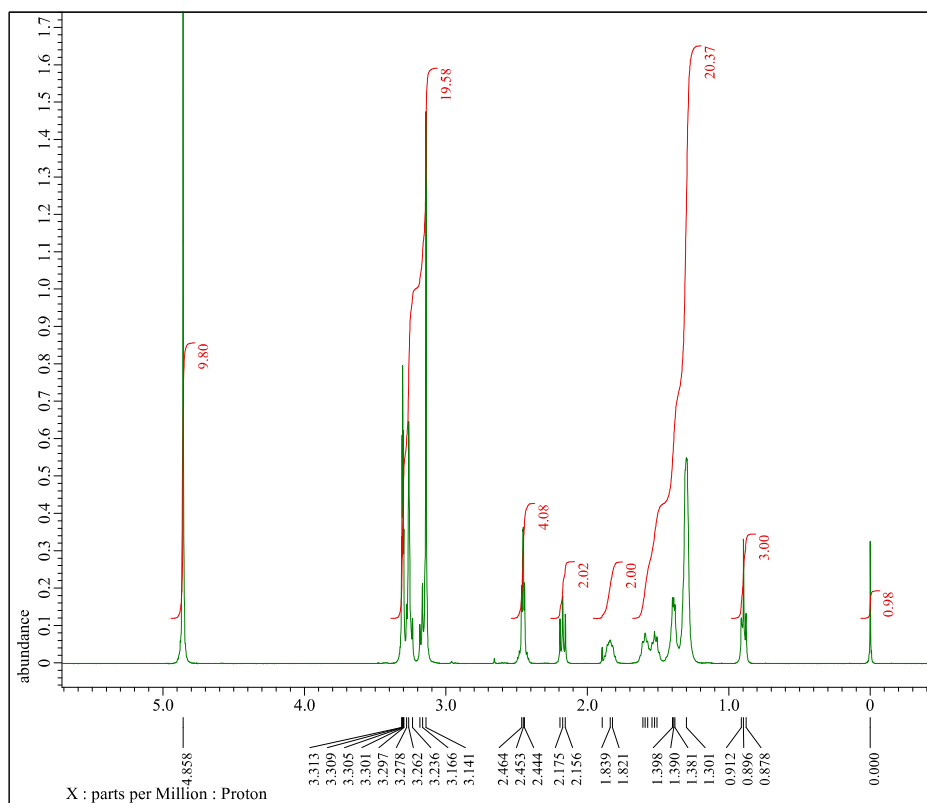

Figure S1. <sup>1</sup>H NMR spectrum of 9-2-2-6.

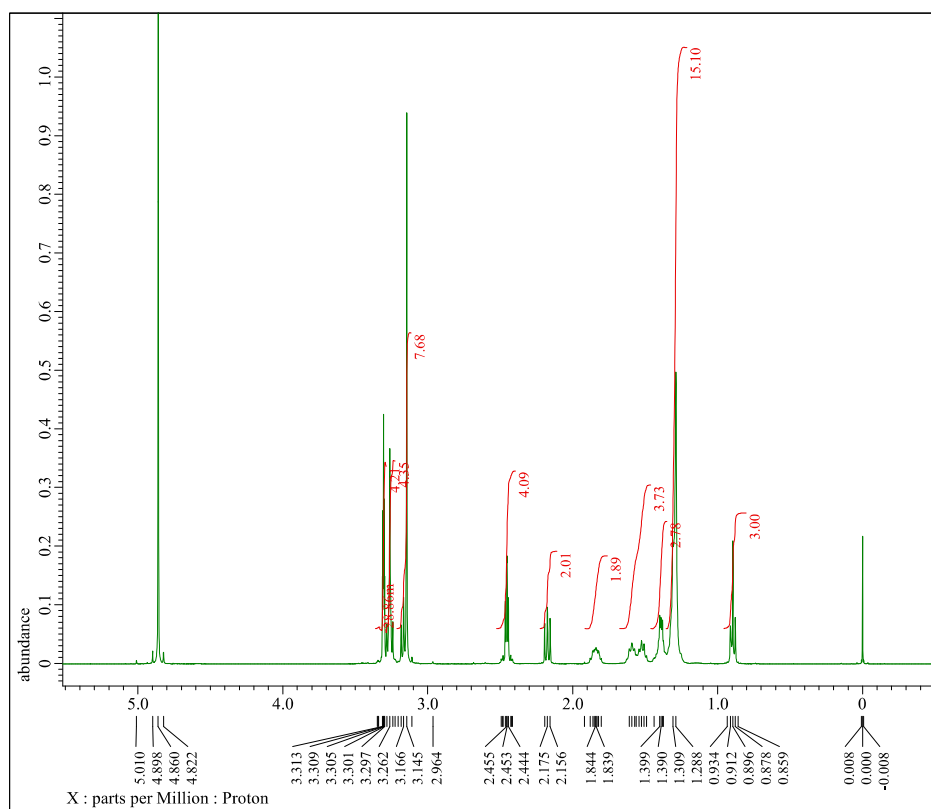

Figure S2. <sup>1</sup>H NMR spectrum of 11-2-2-6.

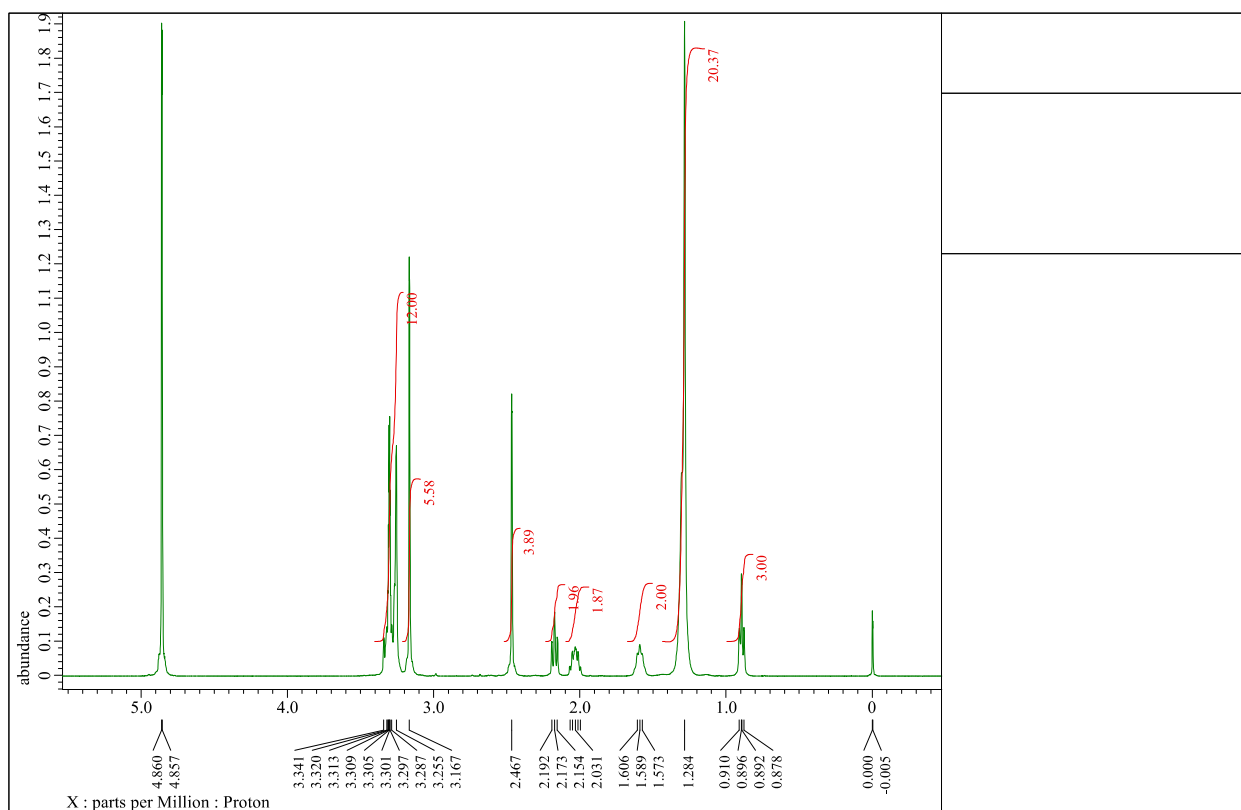

Figure S3. <sup>1</sup>H NMR spectrum of 13-2-2-3.

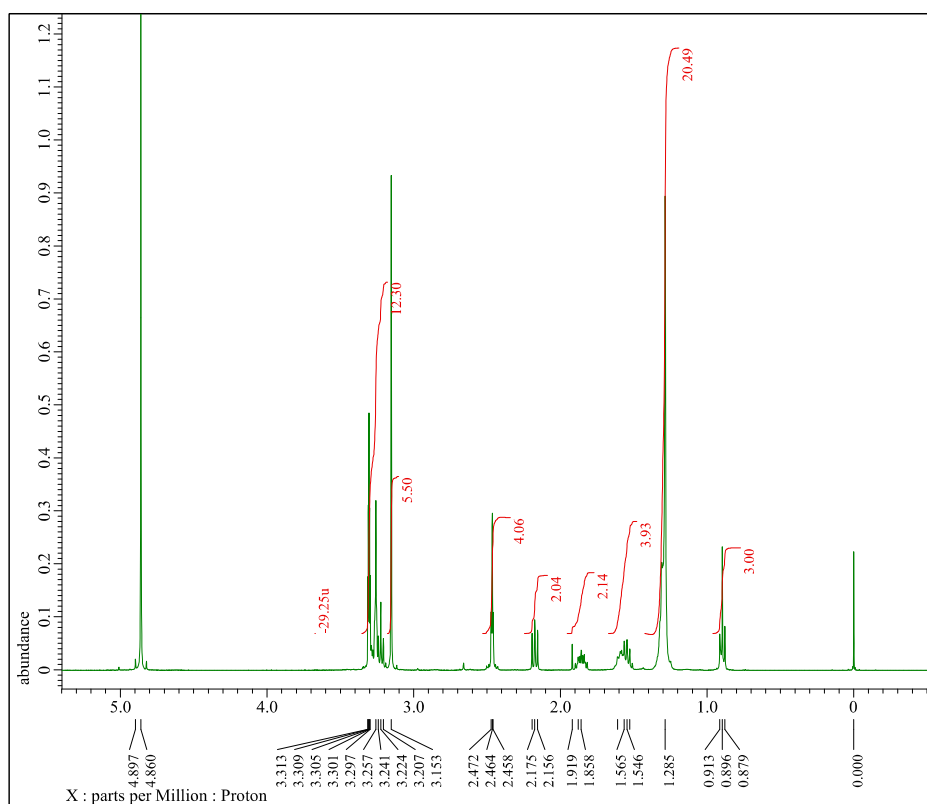

Figure S4. <sup>1</sup>H NMR spectrum of 13-2-2-4.

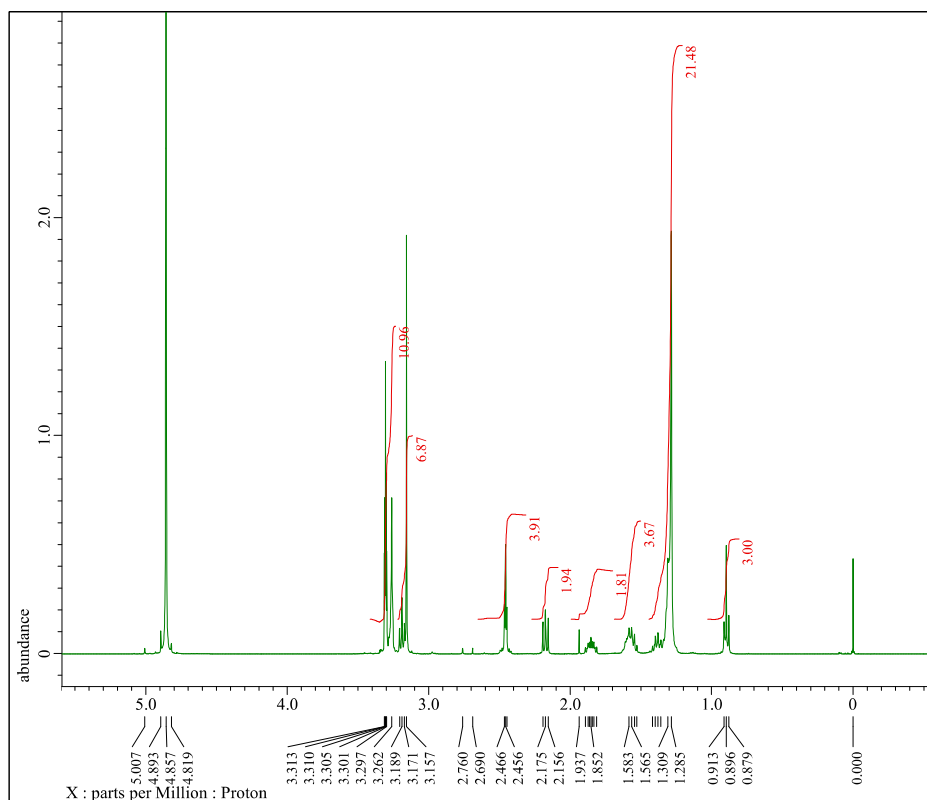

Figure S5.  $^1\text{H}$  NMR spectrum of 13-2-2-5.

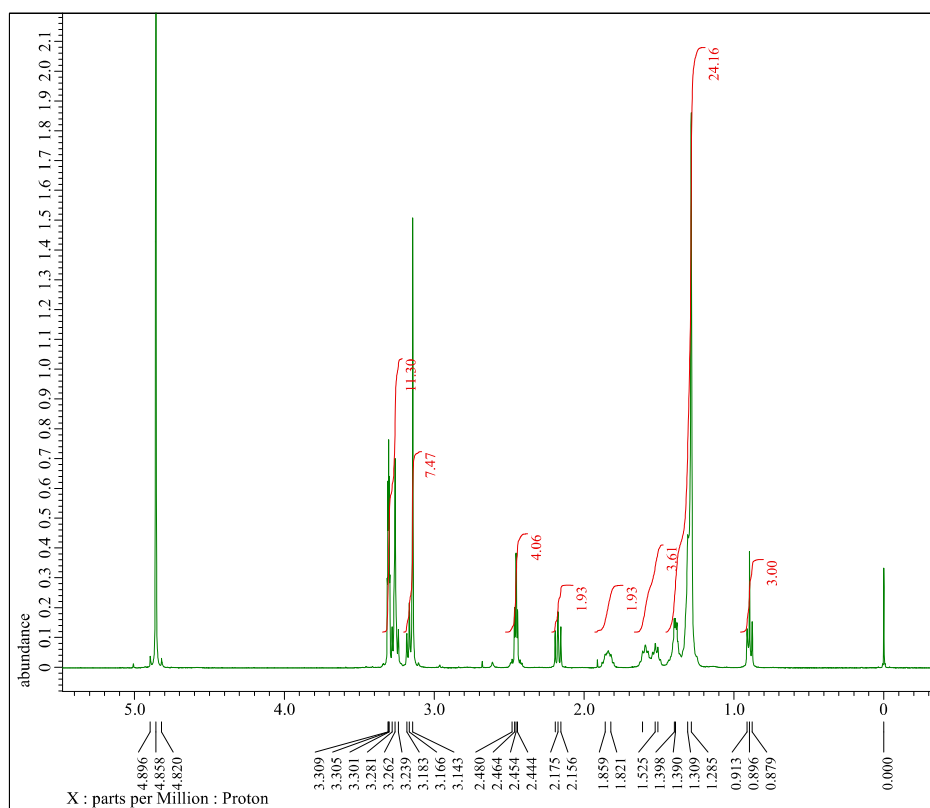

Figure S6.  $^1\text{H}$  NMR spectrum of 13-2-2-6.

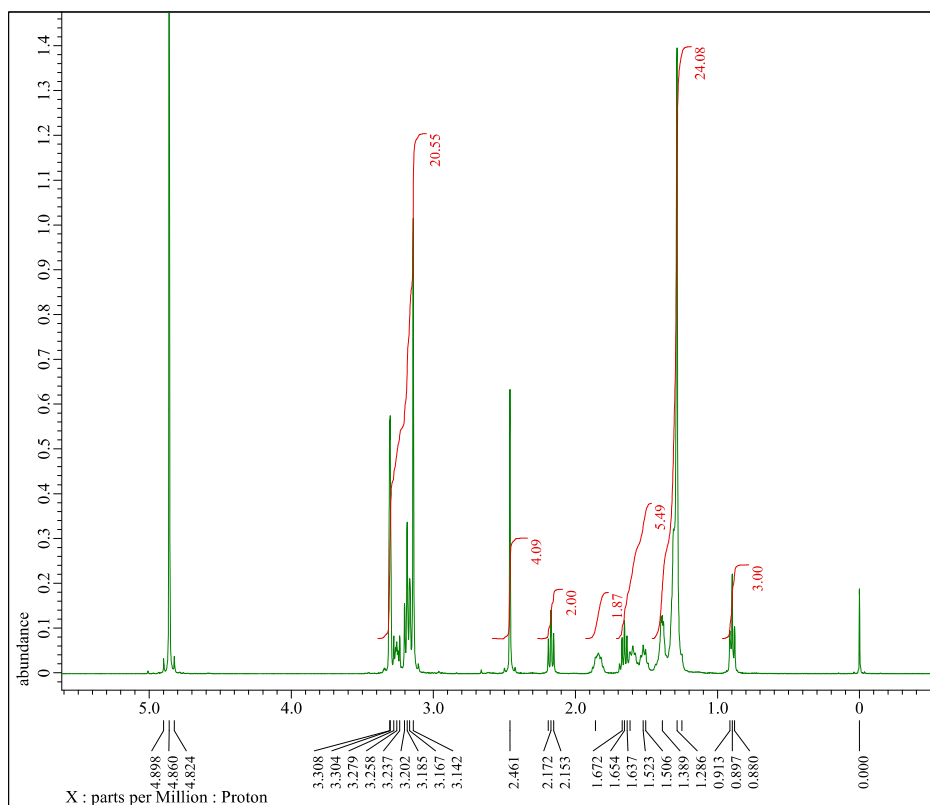

Figure S7.  $^1\text{H}$  NMR spectrum of 13-3-2-6.

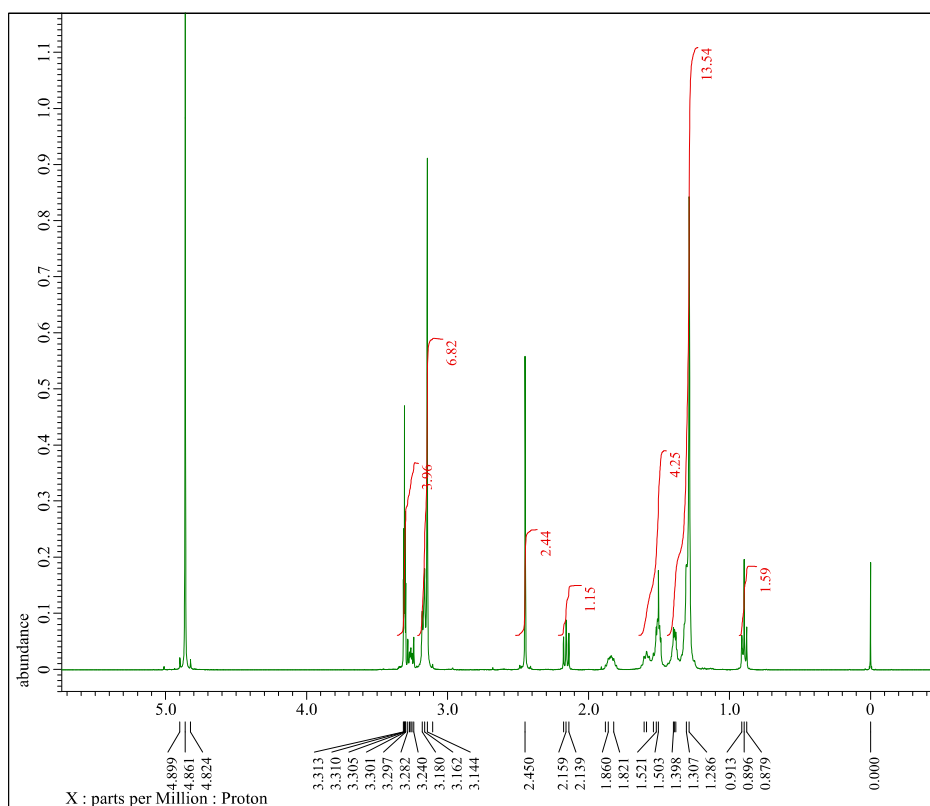

Figure S8.  $^1\text{H}$  NMR spectrum of 13-4-2-6.

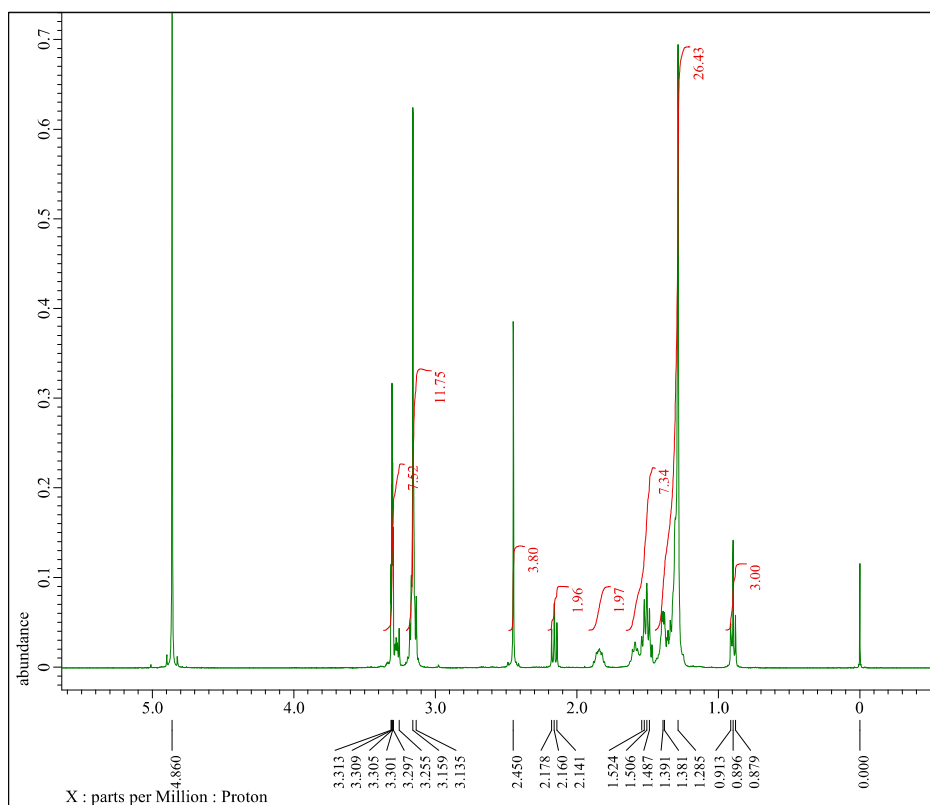

Figure S9. <sup>1</sup>H NMR spectrum of 13-5-2-6.

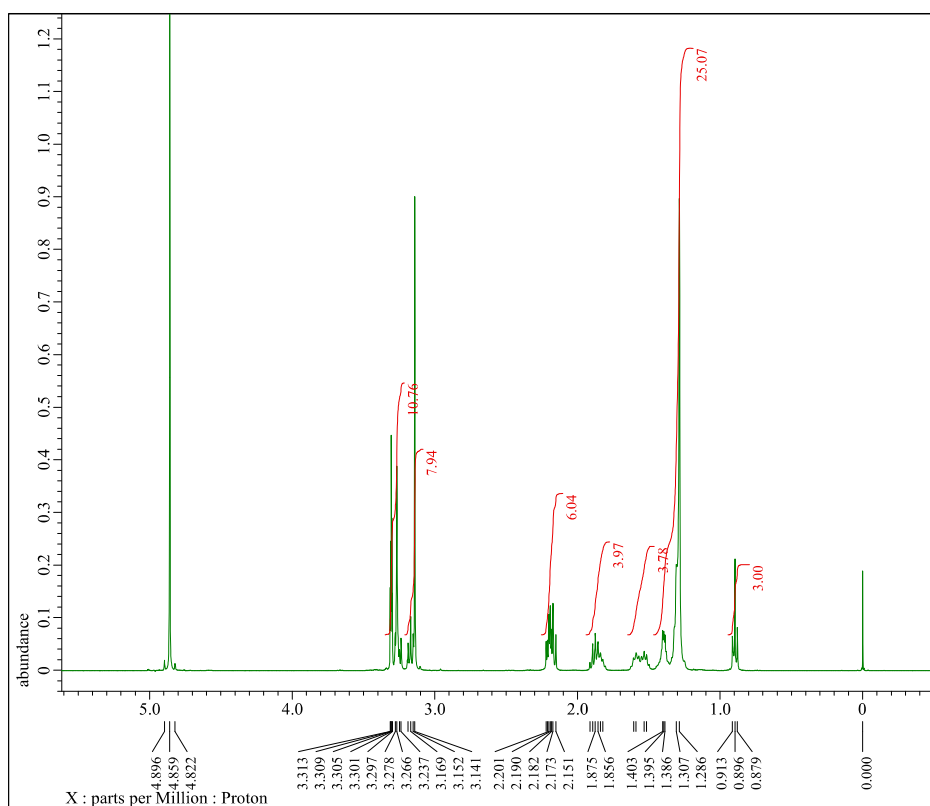

Figure S10. <sup>1</sup>H NMR spectrum of 13-2-3-6.
