# Supplementary material for: Amidoamine Oxide Surfactants as Low-Molecular-Weight Hydrogelators: Effect of Methylene Chain Length on Aggregate Structure and Rheological Behavior
Source: MDPI journal article supplement (doi:10.3390/gels9030261), 2023-03-22
Supplement: s1 [file s1]

ESI+ MS

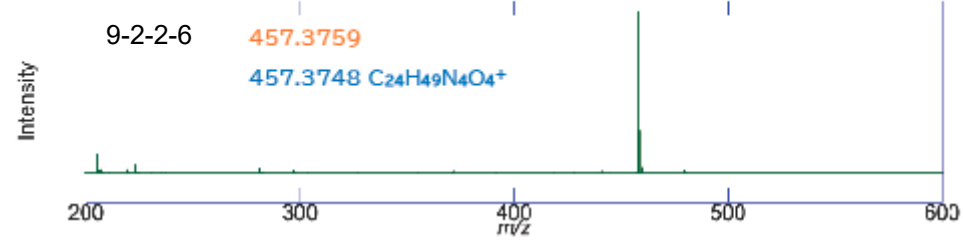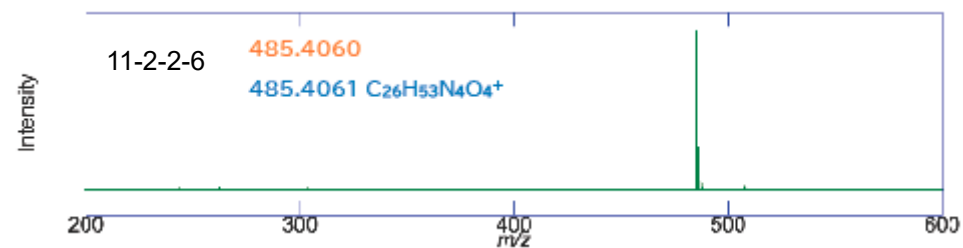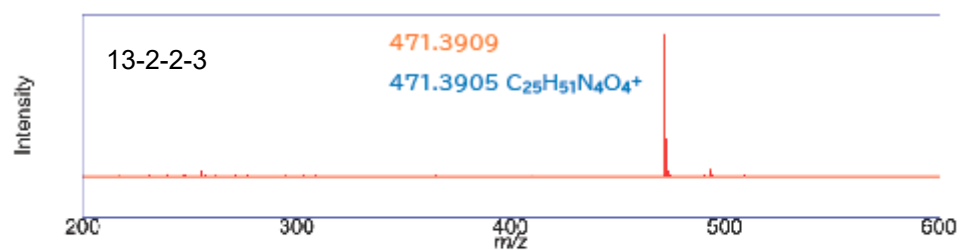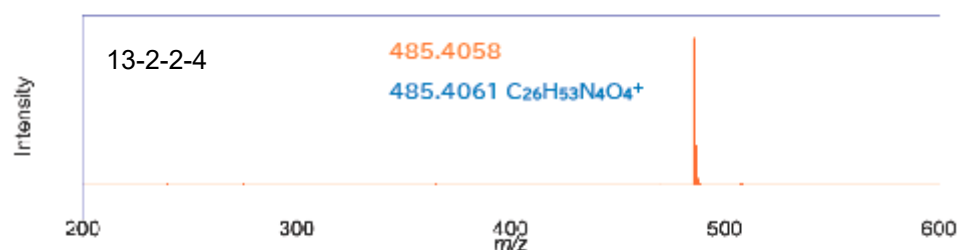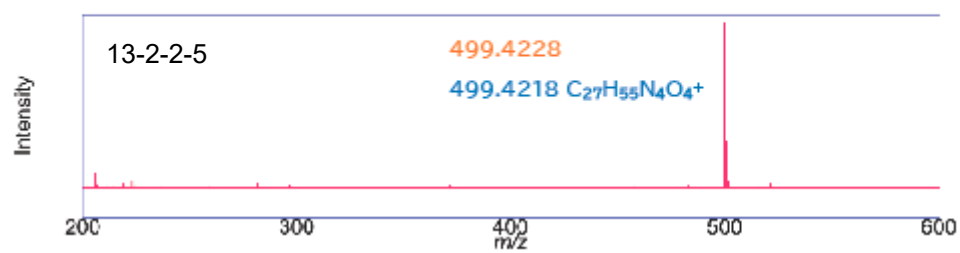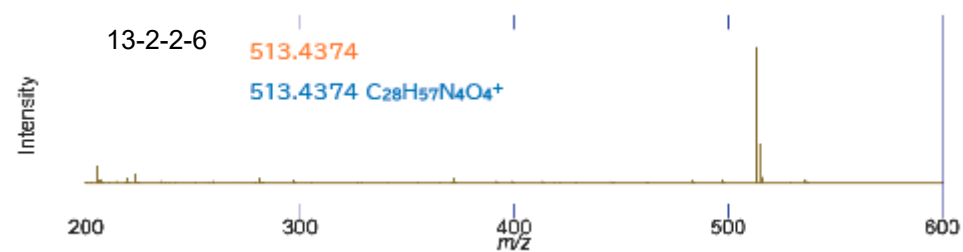

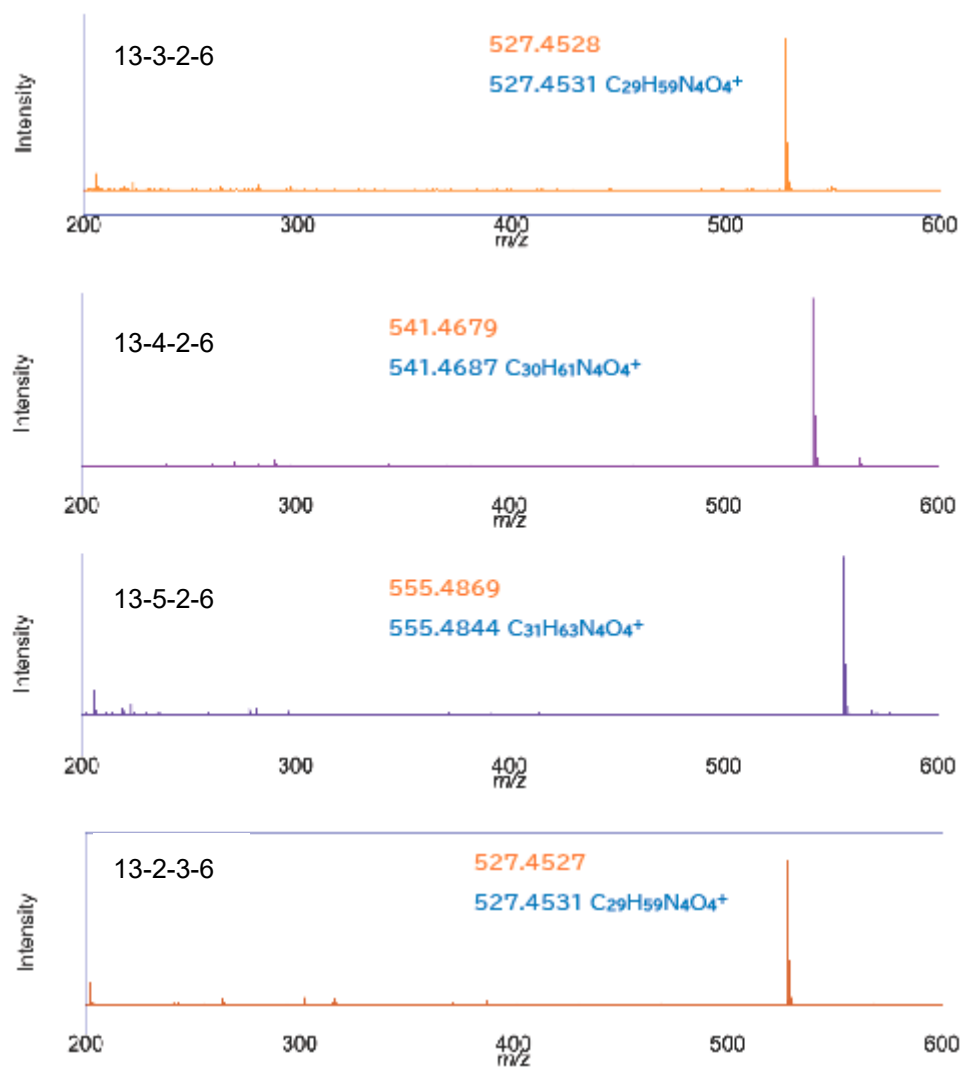

Figure S11. Mass spectrometry of AAOs we synthesized in this study. In the figure, the values in the upper row are actual measured values, and the values in the lower row are calculated values from the molecular formula listed.
